# Supplementary material
Source: Springer Nature journal article supplement (https://www.springermedizin.de/resource/supplementary/12957_2011_818_MOESM4_ESM.pdf/9565942)

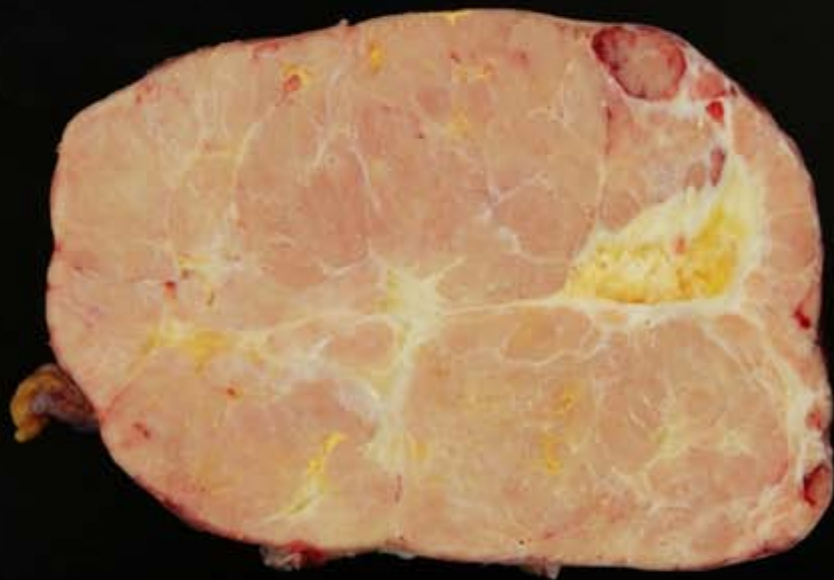

15

20

P902116

30

35

Supplement: MOESM4 [file 9565942]
